# Supplementary material for: Changes in Health-Related Behaviours and Mental Health in a UK Public Sample during the First Set of COVID-19 Public Health Restrictions
Source: Int J Environ Res Public Health. 2022 Mar 26;19(7):3959. doi: 10.3390/ijerph19073959 (PMC8997575; doi:10.3390/ijerph19073959)
Supplement: Supplementary file 1 [file ijerph-19-03959-s001.zip › ijerph-1608629-supplementary.pdf]

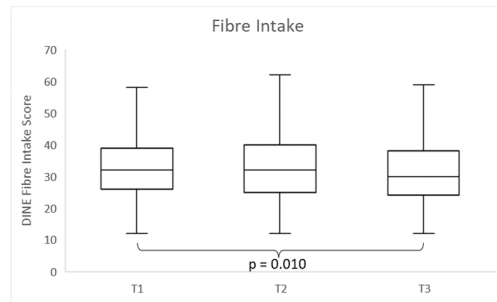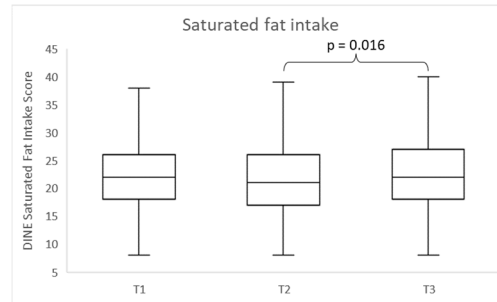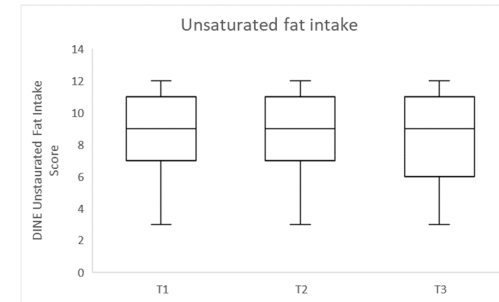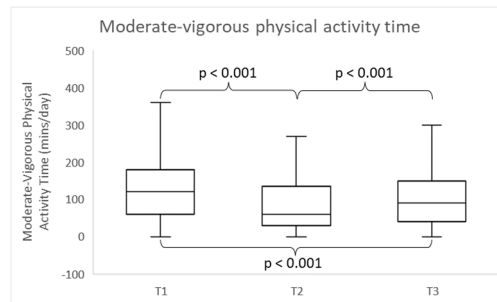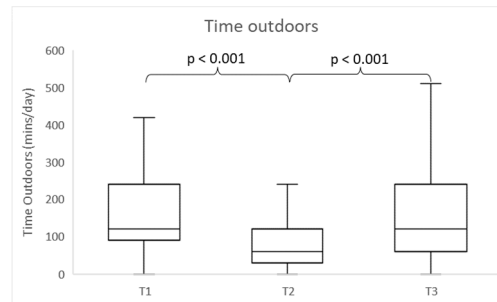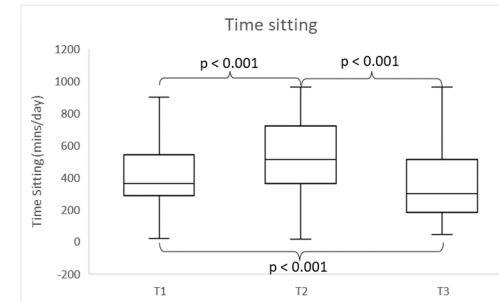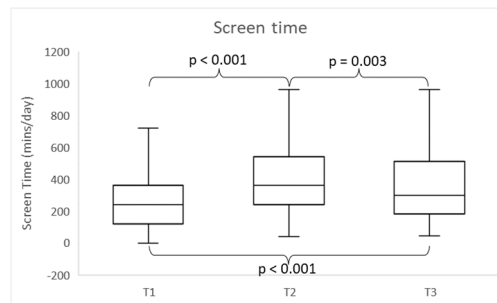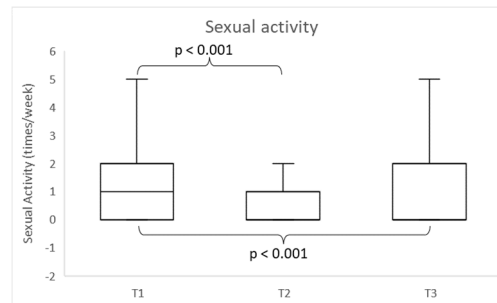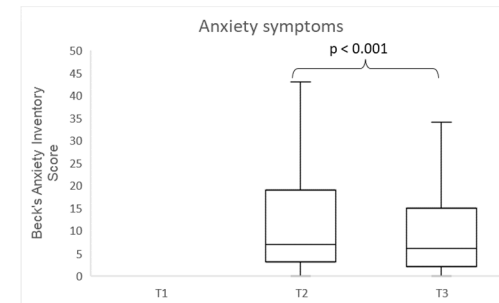

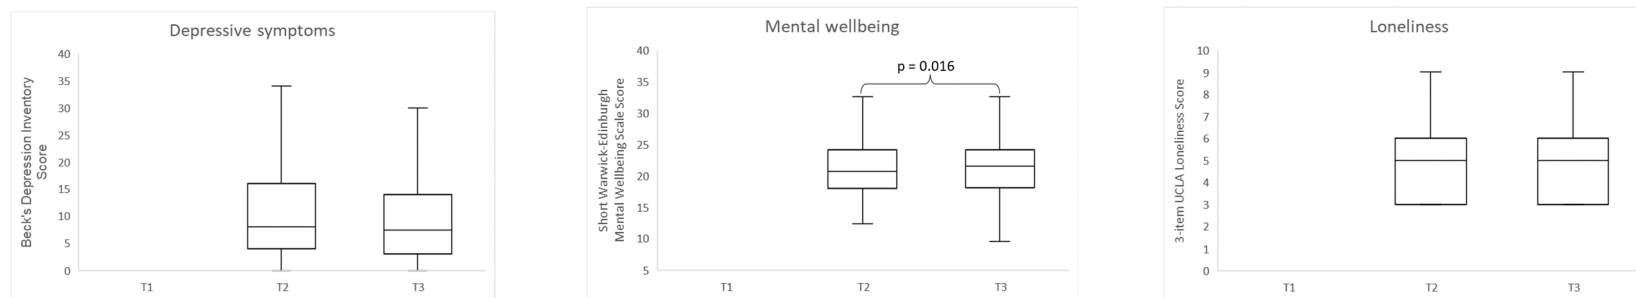

\*Only significant differences ( $p < 0.017$  after Bonferroni adjustment for multiple comparisons) are highlighted.

**Figure S1.** Box and whisker plot tiles displaying changes \* in lifestyle behaviours and health outcomes at different timepoints during the first set of COVID-19 public health restrictions.

**Table S1.** Changes in DINE fibre categories at different timepoints during the first set of COVID-19 public health restrictions.

|                      | Fibre category at T2 |        |      | Count, n | X <sup>2</sup> | p value |
|----------------------|----------------------|--------|------|----------|----------------|---------|
| Fibre category at T1 | Low                  | Medium | High |          |                |         |
| Low                  | 92                   | 26     | 2    | 296      | 5.48           | p=0.140 |
| Medium               | 25                   | 62     | 23   |          |                |         |
| High                 | 6                    | 12     | 48   |          |                |         |
|                      |                      |        |      |          |                |         |
|                      | Fibre category at T3 |        |      | Count, n | X <sup>2</sup> | p value |
| Fibre category at T1 | Low                  | Medium | High |          |                |         |
| Low                  | 95                   | 23     | 2    | 296      | 6.13           | p=0.105 |
| Medium               | 39                   | 56     | 15   |          |                |         |
| High                 | 5                    | 20     | 41   |          |                |         |
|                      |                      |        |      |          |                |         |
|                      | Fibre category at T3 |        |      |          |                |         |
| Fibre category at T2 | Low                  | Medium | High |          |                |         |
| Low                  | 89                   | 31     | 3    | 296      | 6.97           | p=0.073 |
| Medium               | 38                   | 44     | 18   |          |                |         |
| High                 | 12                   | 24     | 37   |          |                |         |

Abbreviations: T1 = timepoint 1; T2 = timepoint 2; T3 = timepoint 3

\* = Significant difference (p<0.017 after Bonferroni adjustment)

**Table S2.** Changes in DINE saturated fat categories at different timepoints during the first set of COVID-19 public health restrictions.

|                                     | <b>Saturated fat category at T2</b> |        |      | <b>Count, n</b> | <b>X<sup>2</sup></b> | <b>p value</b> |
|-------------------------------------|-------------------------------------|--------|------|-----------------|----------------------|----------------|
| <b>Saturated fat category at T1</b> | Low                                 | Medium | High |                 |                      |                |
| Low                                 | 232                                 | 13     | 1    | 296             | 4.60                 | p=0.203        |
| Medium                              | 24                                  | 22     | 1    |                 |                      |                |
| High                                | 0                                   | 2      | 1    |                 |                      |                |
|                                     |                                     |        |      |                 |                      |                |
|                                     | <b>Saturated fat category at T3</b> |        |      |                 |                      |                |
| <b>Saturated fat category at T1</b> | Low                                 | Medium | High |                 |                      |                |
| Low                                 | 226                                 | 18     | 2    | 296             | 4.46                 | p=0.216        |
| Medium                              | 26                                  | 20     | 1    |                 |                      |                |
| High                                | 0                                   | 3      | 0    |                 |                      |                |
|                                     |                                     |        |      |                 |                      |                |
|                                     | <b>Saturated fat category at T3</b> |        |      |                 |                      |                |
| <b>Saturated fat category at T2</b> | Low                                 | Medium | High |                 |                      |                |
| Low                                 | 230                                 | 23     | 3    | 296             | 1.41                 | p=0.703        |
| Medium                              | 20                                  | 17     | 0    |                 |                      |                |
| High                                | 2                                   | 1      | 0    |                 |                      |                |

Abbreviations: T1 = timepoint 1; T2 = timepoint 2; T3 = timepoint 3

\* = Significant difference (p<0.017 after Bonferroni adjustment)

**Table S3.** Changes in DINE unsaturated fat categories at different timepoints during the first set of COVID-19 public health restrictions.

|                                | Unsaturated fat category at T2 |        |      | Count, n | X <sup>2</sup> | p value |
|--------------------------------|--------------------------------|--------|------|----------|----------------|---------|
| Unsaturated fat category at T1 | Low                            | Medium | High |          |                |         |
| Low                            | 17                             | 1      | 0    | 296      | 2.71           | p=0.258 |
| Medium                         | 5                              | 145    | 12   |          |                |         |
| High                           | 0                              | 13     | 103  |          |                |         |
|                                |                                |        |      |          |                |         |
|                                | Unsaturated fat category at T3 |        |      |          |                |         |
| Unsaturated fat category at T1 | Low                            | Medium | High |          |                |         |
| Low                            | 6                              | 11     | 1    | 296      | 2.83           | p=0.419 |
| Medium                         | 18                             | 113    | 31   |          |                |         |
| High                           | 3                              | 34     | 79   |          |                |         |
|                                |                                |        |      |          |                |         |
|                                | Unsaturated fat category at T3 |        |      |          |                |         |
| Unsaturated fat category at T2 | Low                            | Medium | High |          |                |         |
| Low                            | 9                              | 11     | 2    | 296      | 0.95           | p=0.814 |
| Medium                         | 15                             | 111    | 33   |          |                |         |
| High                           | 3                              | 36     | 76   |          |                |         |

Abbreviations: T2 = timepoint 2; T3 = timepoint 3

\* = Significant difference (p<0.017 after Bonferroni adjustment)

**Table S4.** Changes in compliance with MVPA guidelines at different timepoints during the first set of COVID-19 public health restrictions.

|                               | Meeting MVPA guidelines at T2 |    | Count, n | X <sup>2</sup> | p value  |
|-------------------------------|-------------------------------|----|----------|----------------|----------|
| Meeting MVPA guidelines at T1 | Yes                           | No |          |                |          |
| Yes                           | 218                           | 53 | 288      | 35.86          | p<0.001* |
| No                            | 6                             | 11 |          |                |          |
|                               |                               |    |          |                |          |
|                               | Meeting MVPA guidelines at T3 |    | Count, n | X <sup>2</sup> | p value  |
| Meeting MVPA guidelines at T1 | Yes                           | No |          |                |          |
| Yes                           | 228                           | 43 | 288      | 19.32          | p<0.001* |
| No                            | 10                            | 7  |          |                |          |
|                               |                               |    |          |                |          |
|                               | Meeting MVPA guidelines at T3 |    | Count, n | X <sup>2</sup> | p value  |
| Meeting MVPA guidelines at T2 | Yes                           | No |          |                |          |
| Yes                           | 200                           | 24 | 288      | 2.73           | p=0.099  |
| No                            | 38                            | 26 |          |                |          |

Abbreviations: MVPA = moderate-vigorous physical activity; T1 = timepoint 1; T2 = timepoint 2; T3 = timepoint 3

\* = Significant difference (p<0.017 after Bonferroni adjustment)

**Table S5.** Changes in compliance with sitting and screen time thresholds at different timepoints during the first set of COVID-19 public health restrictions.

|                                            | <b>≥480 minutes/day sitting time at T2</b> |     | <b>Count, n</b> | <b>X<sup>2</sup></b> | <b>p value</b> |
|--------------------------------------------|--------------------------------------------|-----|-----------------|----------------------|----------------|
| <b>≥480 minutes/day sitting time at T1</b> | Yes                                        | No  |                 |                      |                |
| Yes                                        | 104                                        | 13  | 280             | 45.10                | p<0.001*       |
| No                                         | 76                                         | 88  |                 |                      |                |
|                                            |                                            |     |                 |                      |                |
|                                            | <b>≥480 minutes/day sitting time at T3</b> |     | <b>Count, n</b> | <b>X<sup>2</sup></b> | <b>p value</b> |
| <b>≥480 minutes/day sitting time at T1</b> | Yes                                        | No  |                 |                      |                |
| Yes                                        | 86                                         | 29  | 284             | 8.48                 | p=0.004*       |
| No                                         | 57                                         | 108 |                 |                      |                |
|                                            |                                            |     |                 |                      |                |
|                                            | <b>≥480 minutes/day sitting time at T3</b> |     | <b>Count, n</b> | <b>X<sup>2</sup></b> | <b>p value</b> |
| <b>≥480 minutes/day sitting time at T2</b> | Yes                                        | No  |                 |                      |                |
| Yes                                        | 122                                        | 60  | 284             | 20.25                | p<0.001*       |
| No                                         | 19                                         | 83  |                 |                      |                |
|                                            |                                            |     |                 |                      |                |
|                                            | <b>≥480 minutes/day screen time at T2</b>  |     | <b>Count, n</b> | <b>X<sup>2</sup></b> | <b>p value</b> |
| <b>≥480 minutes/day screen time at T1</b>  | Yes                                        | No  |                 |                      |                |
| Yes                                        | 53                                         | 5   | 293             | 37.12                | p<0.001*       |
| No                                         | 52                                         | 183 |                 |                      |                |
|                                            |                                            |     |                 |                      |                |

|                                    | ≥480 minutes/day screen time at T3 |     | Count, n | X <sup>2</sup> | p value  |
|------------------------------------|------------------------------------|-----|----------|----------------|----------|
| ≥480 minutes/day screen time at T1 | Yes                                | No  |          |                |          |
| Yes                                | 41                                 | 17  | 294      | 19.01          | p<0.001* |
| No                                 | 55                                 | 181 |          |                |          |
|                                    |                                    |     |          |                |          |
|                                    | ≥480 minutes/day screen time at T3 |     | Count, n | X <sup>2</sup> | p value  |
| ≥480 minutes/day screen time at T2 | Yes                                | No  |          |                |          |
| Yes                                | 67                                 | 38  | 293      | 0.955          | p=0.328  |
| No                                 | 29                                 | 159 |          |                |          |

Abbreviations: T1 = timepoint 1; T2 = timepoint 2; T3 = timepoint 3

\* = Significant difference (p<0.017 after Bonferroni adjustment)

**Table S6.** Changes in categorical mental health outcomes between T2 and T3 during the first set of COVID-19 public health restrictions.

|                               | <b>BAI category at T3</b>     |                 | <b>Count, n</b> | <b>X<sup>2</sup></b> | <b>p value</b> |
|-------------------------------|-------------------------------|-----------------|-----------------|----------------------|----------------|
| <b>BAI category at T2</b>     | Mild                          | Moderate-severe |                 |                      |                |
| Mild                          | 196                           | 13              | 296             | 5.95                 | p=0.015*       |
| Moderate-severe               | 30                            | 57              |                 |                      |                |
|                               |                               |                 |                 |                      |                |
|                               | <b>BDI category at T3</b>     |                 | <b>Count, n</b> | <b>X<sup>2</sup></b> | <b>p value</b> |
| <b>BDI category at T2</b>     | Mild                          | Moderate-severe |                 |                      |                |
| Mild                          | 233                           | 15              | 296             | 0.31                 | p=0.860        |
| Moderate-severe               | 17                            | 31              |                 |                      |                |
|                               |                               |                 |                 |                      |                |
|                               | <b>SWEMWBS category at T3</b> |                 | <b>Count, n</b> | <b>X<sup>2</sup></b> | <b>p value</b> |
| <b>SWEMWBS category at T2</b> | Low                           | Medium-high     |                 |                      |                |
| Low                           | 10                            | 11              | 296             | 0.00                 | p=1.000        |
| Medium-high                   | 10                            | 265             |                 |                      |                |

Abbreviations: BAI = Beck's Anxiety Inventory; BDI = Beck's Depression Inventory; SWEMWBS = Short Warwick–Edinburgh Mental Wellbeing Scale; T2 = timepoint 2; T3 = timepoint 3

\* = Significant difference (p<0.05)
